# Supplementary material for: Epigenetic initiation of the TH17 differentiation program is promoted by Cxxc finger protein 1
Source: PubMed Central journal article supplement — Sci Adv. 2019 Oct 9;5(10):eaax1608. doi: 10.1126/sciadv.aax1608 (PMC6785255; doi:10.1126/sciadv.aax1608), 2019-10-09
Supplement: aax1608_SM.pdf [file aax1608_SM.pdf]

## Supplementary Materials for

### Epigenetic initiation of the T<sub>H</sub>17 differentiation program is promoted by Cxxc finger protein 1

Feng Lin\*, Xiaoyu Meng\*, Yixin Guo, Wenqiang Cao, Wanlu Liu, Qiming Xia, Zhaoyuan Hui, Jian Chen, Shenghui Hong, Xuliang Zhang, Chuan Wu, Di Wang, Jianli Wang, Linrong Lu, Wenbin Qian, Lai Wei, Lie Wang\*

\*Corresponding author. Email: wanglie@zju.edu.cn

Published 9 October 2019, *Sci. Adv.* **5**, eaax1608 (2019)  
DOI: 10.1126/sciadv.aax1608

#### This PDF file includes:

Supplementary Materials and Methods

Fig. S1. Phenotype of Cxxc1 conditional KO mice.

Fig. S2 (related to Fig. 1). Analysis of T cell differentiation in vitro from WT and Cxxc1-deficient mice.

Fig. S3. Phenotype of ROR $\gamma$ <sup>cre</sup>Cxxc1<sup>wt/wt</sup> and ROR $\gamma$ <sup>cre</sup>Cxxc1<sup>fl/fl</sup> mice.

Fig. S4 (related to Fig. 2). Cxxc1 deficiency restricts T cell-mediated autoimmunity.

Fig. S5. Cxxc1 deficiency increased sensitivity to *C. rodentium* infection.

Fig. S6. Cxxc1 regulates T<sub>H</sub>17 differentiation with its H3K4me3 function.

Fig. S7. Genome-wide maps of Cxxc1 binding and H3K4me3 modifications in T<sub>H</sub>17 cells differentiated from naive CD4<sup>+</sup> T cells with TGF- $\beta$ 1 and IL-6 for 24 hours.

Fig. S8 (related to Fig. 5). The IL-6–Stat3 signaling pathway was defective after Cxxc1 deletion.

Fig. S9 (related to Fig. 6). Cxxc1 mediates T<sub>H</sub>17 cell differentiation by mediating IL-6R $\alpha$  expression.

Table S1. Down regulated genes in Cfp1 deficient Th17 cells.

## Supplementary Materials and Methods

### Cell proliferation assay

Naive CD4<sup>+</sup> or CD8<sup>+</sup> T cells (CD25<sup>-</sup>CD62L<sup>hi</sup>CD44<sup>lo</sup>) from WT and dLck<sup>cre</sup> Cxzc1<sup>fl/fl</sup> mice were sorted, and stained with CellTrace reagent (C34557, Invitrogen) according to manufacturer's instructions, then cultured in indicated conditions for 4 days.

### Enzyme-Linked Immunosorbent Assay

Interleukin 6 Receptor alpha in the culture supernatant was measured at different time points under Th17 polarization condition, by sandwich enzyme-linked immunosorbent assay (ELISA) (R&D, #DY1830). The concentrations of mouse IL-17A and IFN- $\gamma$  were measured with ELISA kits (eBioscience) according to the manufacturer's instructions.

### RNA isolation and real-time qPCR

Total RNA was extracted using TRIzol reagent (Invitrogen). Real-time qPCR was performed using SYBR Premix Ex Taq<sup>TM</sup> II on LC480II Real-Time PCR system (Roche, USA) or CFX96 Touch Real-Time PCR (Bio Rad). Results were normalized to  $\beta$ -actin expression.

### Deletion of Cxzc1 in ERT2<sup>+Cre</sup> Cxzc1<sup>fl/fl</sup> cells

Naive CD4<sup>+</sup> T cells (CD4<sup>+</sup>CD25<sup>-</sup>CD62L<sup>hi</sup>CD44<sup>lo</sup>) from ERT2<sup>+Cre</sup> Cxzc1<sup>fl/fl</sup> mice lymph nodes were sorted and cultured at indicated conditions, at presence of 200 nm 4-hydroxytamoxifen (4-OHT) treatment on the day 0 and day 1.

### Western blotting

Cells were lysed in complete lysis-M buffer (Roche; cat.no. 04719956001), and total protein was subjected to SDS-PAGE (6-10%), transferred onto PVDF membranes. Membranes were blocked with 5% non-fat dry milk or 5% BSA (Bio-Rad) in TBS-T and primary antibodies in 5% BSA in TBS-T and HRP coupled secondary antibodies were diluted at 1:5000 in TBS-T. Detection was performed using Fluor Chem E (Cell Biosciences).

### Plasmid construction

Recombinant vectors encoding murine IL-6R $\alpha$ , gp130, STAT3, ROR $\gamma$ t and the full-length and truncated/mutated Cxzc1 gene constructs were cloned into pMX-IRES-GFP plasmids. Wild-type STAT3, STAT3 (A662C, N664C), and STAT3 (Y705A) were constructed as described (Pernet et al., 2013). Full-length and truncated/muted Cxzc1 were constructed as described (Cao et al., 2016).

### Primers for Plasmid construction:

| Gene               | Forward Primer                                    | Reverse Primer                                        |
|--------------------|---------------------------------------------------|-------------------------------------------------------|
| IL6Ra              | <u>GAATTC</u> CACCGATCTGAGCCACG                   | <u>GCGGCCGCGG</u> ACCCGCATGAGAACT                     |
| gp130              | <u>GCGGCCGCGCT</u> GCAAGATGTCAGCA<br>CCAA         | <u>TACGTAT</u> CAGGAGCCAGTCCTTCACT                    |
| Cxxc1(1-656)       | <u>GAATTC</u> CATGGAAGGAGATGGCTCA<br>GA           | <u>GCGGCCGCT</u> AGTCAGCGGTCGGCACT<br>AGA             |
| Cxxc1<br>(1-367)   | <u>GAATTC</u> CATGGAAGGAGATGGCTCA<br>GA           | <u>GCGGCCGCTT</u> ACCTCTCTGGGTGTTTC<br>CATT           |
| Cxxc1<br>(361-656) | <u>GAATTC</u> AATGTGGAACACCCAGA<br>GAGGG          | <u>A</u><br><u>GCGGCCGCT</u> AGTCAGCGGTCGGCACT<br>AGA |
| Cxxc1<br>(C169A)   | ACGATCAGCTCGGAT <u>GGCT</u> GGTGA<br>GTGCGAGGC    | GCCTCGCACTCACCAG <u>CC</u> ATCCGAGCT<br>GATCGT        |
| Cxxc1<br>(C375A)   | TGCATCTCTCCCGCAG <u>GC</u> CCTGGG<br>GCCTGGCTGTGT | ACACAGCCAGGCCCCAG <u>GC</u> CCTGCGG<br>GAGAGATGCA     |
| RORyt              | <u>GAATTC</u> AAACACTGGGGGAGAGCT<br>TT            | <u>CGGCCGCGG</u> TCAGAGGGCTGAAGGAA<br>A               |

### Primers for qPCR:

### Primers for ChIP-qPCR:

| Gene           | Location | Forward Primer        | Reverse Primer         |
|----------------|----------|-----------------------|------------------------|
| IL-6R $\alpha$ | TSS      | ACCTCCACCGCGTCAGCACA  | TGGTTCCGTTTCGCAGAGTGAG |
| gp130          | TSS      | GCCAGAGCTTCGAGCCATCC  | GGCCCTGTTCTTCTCACCTTCC |
| BATF           | TSS      | AGACAGAACCGAGGTCAGGG  | ACTGCTGGAGTTACCGAGGC   |
| IRF4           | TSS      | GGCTTCCTCCCGCCTCCAAA  | CTGCCCGTCTCCAAGTTCAT   |
| Runx1          | TSS      | CCGCCTATGCTGTGGGTTGA  | GCCTGGCAGTGTGAGAAAGTG  |
| Satb1          | TSS      | GCCCAGTCCTCCGAATGTC   | GTCCCGCTTCTTTGCTCCCT   |
| Rorc           | +10kb    | TGCTGCTAAGAGGATGAAGA  | CCTGGGCTGAGGAAACGATA   |
| Rora           | +400kb   | TTGAGATGATTGCTGCTGAT  | TGTCCTGTGGCTGAGGTTTT   |
| IL21           | TSS      | ATTCCAGTTTTTCAGCATTCA | GTCAGACAAACCAGGTGAGG   |

**Figure S1**

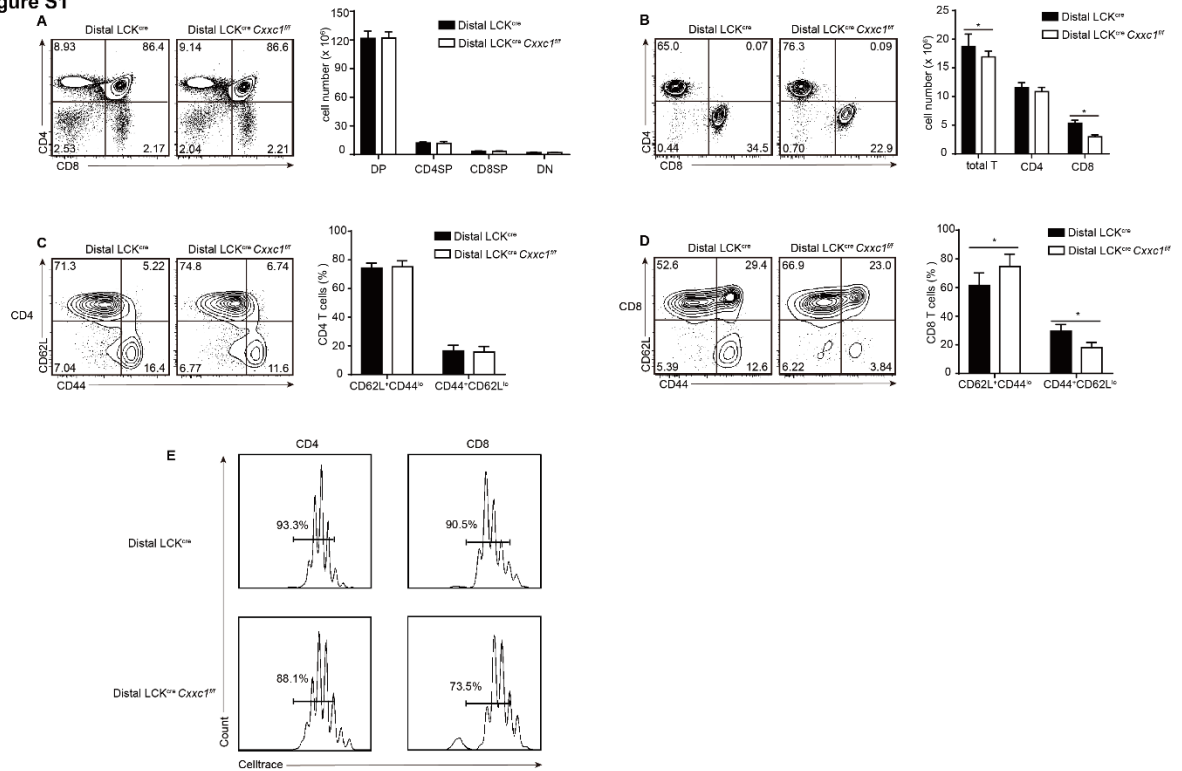

**Fig. S1. Phenotype of Cxhc1 conditional KO mice.**

Flow cytometry assay of CD4<sup>+</sup> and CD8<sup>+</sup> from Thymus. And absolute cell numbers of DN, DP, CD4<sup>+</sup> and CD8<sup>+</sup> SP thymocyte subpopulations.

(A) Splenocytes from dLck<sup>cre</sup> Cxhc1<sup>fl/fl</sup> and WT mice were stained for CD4 and CD8 analyzed by flow cytometry. And absolute cell numbers of Total T, CD4<sup>+</sup> and CD8<sup>+</sup> T-cell subsets.

(C, D) Splenocytes from dLck<sup>cre</sup> Cxhc1<sup>fl/fl</sup> and WT mice were stained for CD4, CD8, CD44, and CD62L and analyzed by flow cytometry.

(E) CellTrace staining of naive CD4<sup>+</sup> or CD8<sup>+</sup> T cells from dLck<sup>cre</sup> Cxhc1<sup>fl/fl</sup> and WT mice after 4 days of stimulation in the presence of anti-CD3 and anti-CD28 antibody. The statistical significance was calculated by Student's *t*-test. \*, *P* ≤ 0.05. Error bars show the mean ± SD. Data are from six-mice analysis.

Figure S2

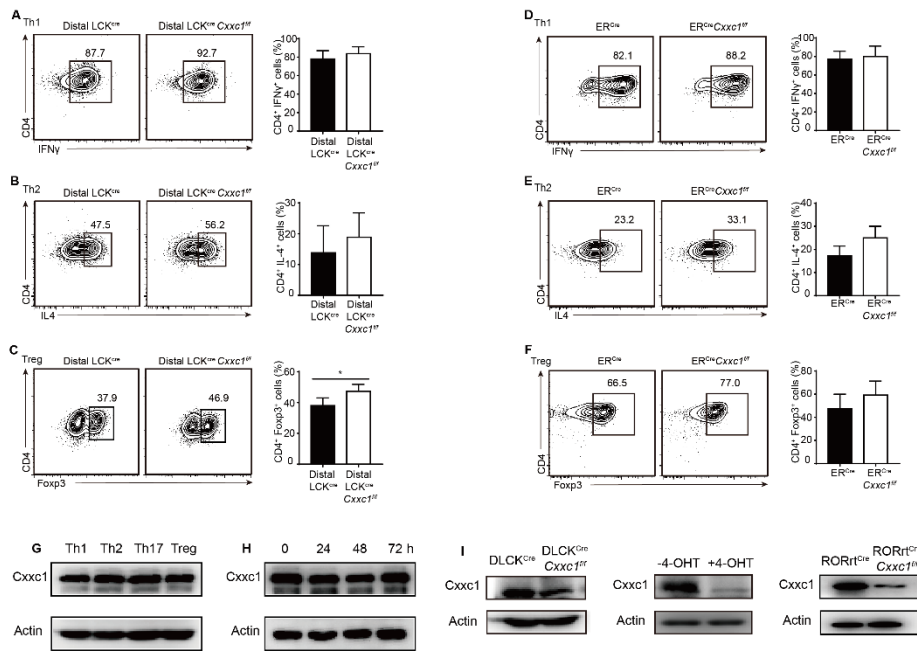

**Fig. S2. (related to Fig. 1). Analysis of T cell differentiation in vitro from WT and Cxhc1-deficient mice. (A-C)** Naive CD4<sup>+</sup>T cells were sorted from dLck<sup>cre</sup> Cxhc1<sup>fl/fl</sup> and WT mice and then polarized into (A) Th1 cells, (B) Th2 cells, (C) iTreg cells for 4 days in vitro, and analyzed by intracellular staining after restimulation. These experiments were repeated for at least six times with the consistent results. **(D-F)** Naive CD4<sup>+</sup> T cells from ERT2<sup>cre</sup> Cxhc1<sup>fl/fl</sup> and WT mice were polarized into (D) Th1 cells, (E) Th2 cells, (F) iTreg cells, at presence or absence of 4-OHT for 4 days in vitro, and then analyzed by intracellular cytokines staining after restimulation. These experiments were repeated for at least five times. **(G, H)** The expression levels of Cxhc1 protein in T helper subsets and different stages of Th17 cells. **(I)** Detection of Cxhc1 protein deletion in Th17 cells (72 hr). DLCK<sup>cre</sup> (left), ERT2<sup>Cre</sup> (middle), ROR $\gamma$ <sup>cre</sup> (right). One of four experiments is shown. The statistical significance was calculated by Student's *t*-test. Error bars show the mean  $\pm$  SD.

**Figure S3**

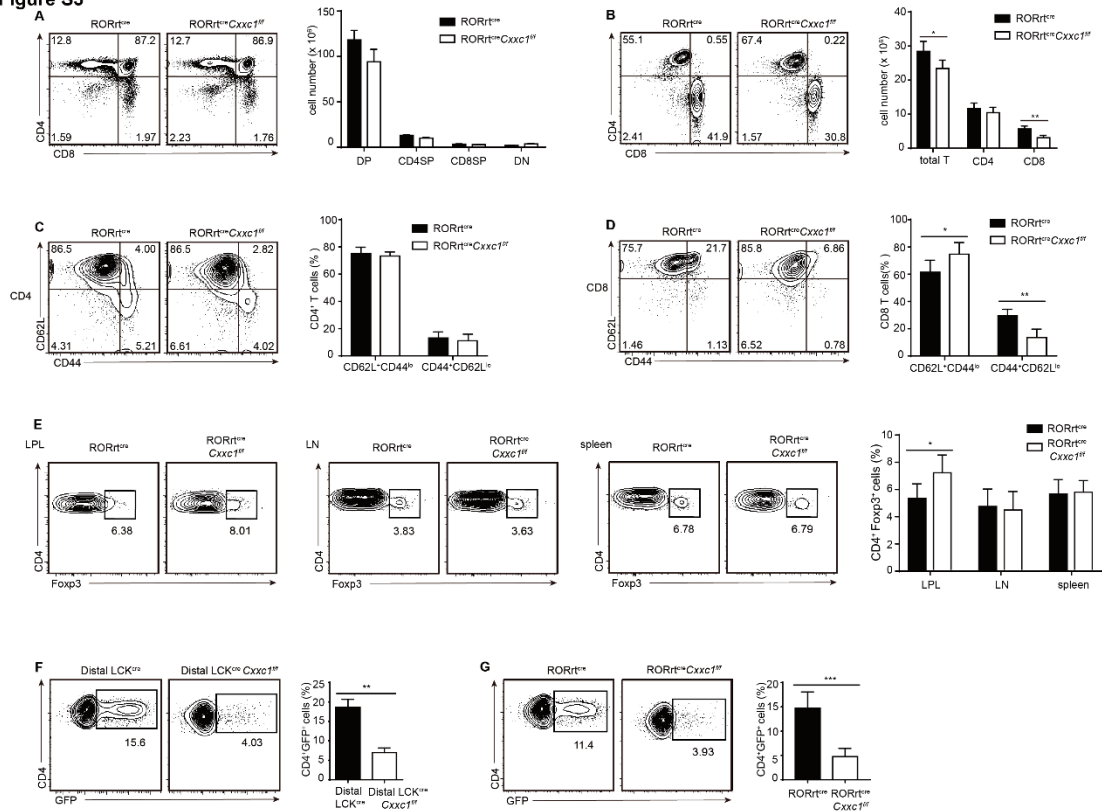

**Fig. S3. Phenotype of  $ROR\gamma t^{cre} Cxcr1^{wt/wt}$  and  $ROR\gamma t^{cre} Cxcr1^{fl/fl}$  mice.**

(A) Flow cytometry assay of CD4<sup>+</sup> and CD8<sup>+</sup> from Thymus. And absolute cell numbers of DN, DP, CD4<sup>+</sup> and CD8<sup>+</sup> SP thymocyte subpopulations. One of five experiments is shown.

(B) Splenocytes from  $ROR\gamma t^{cre} Cxcr1^{fl/fl}$  and WT mice were stained for CD4 and CD8 and analyzed by flow cytometry. And absolute cell numbers of Total T, CD4<sup>+</sup> and CD8<sup>+</sup> T-cell subsets. One of five experiments is shown.

(C, D) Splenocytes from  $ROR\gamma t^{cre} Cxcr1^{fl/fl}$  and WT mice were stained for CD4, CD8, CD44, and CD62L and analyzed by flow cytometry. One of five experiments is shown.

(E) Frequencies of Foxp3 in  $ROR\gamma t^{cre} Cxcr1^{fl/fl}$  and WT mice, in LPL, lymph nodes and spleen. One of five experiments is shown.

(F, G) Naive CD4<sup>+</sup>T cells from IL17A<sup>eGFP</sup> reporter of dLck<sup>cre</sup> Cxcr1<sup>fl/fl</sup>,  $ROR\gamma t^{cre} Cxcr1^{fl/fl}$  or WT mice were differentiated into Th17 cells with IL-6 and TGF-β1, and then CD4<sup>+</sup> GFP<sup>+</sup> cells were analyzed by flow cytometry after 96 hours. One of four experiments is shown.

The statistical significance was calculated by Student's *t*-test. \*,  $P \leq 0.05$ ; \*\*,  $P \leq 0.01$ ; \*\*\*,  $P \leq 0.001$ . Error bars show the mean  $\pm$  SD.

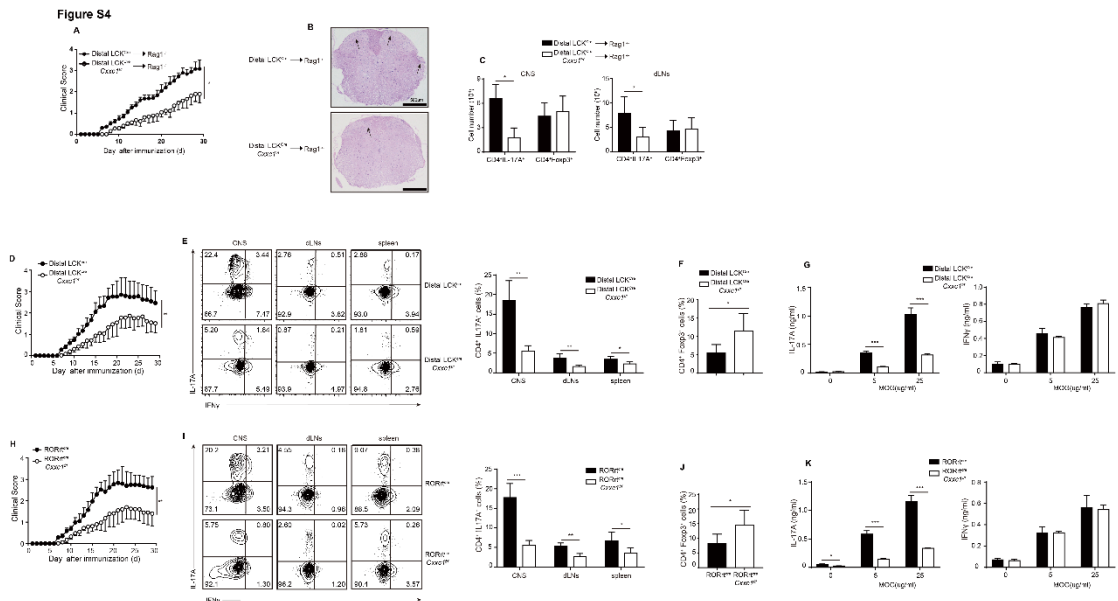

**Fig. S4. (related to Fig. 2). Cxcr1 deficiency restricts T cell-mediated autoimmunity.**

**(A)** Mean clinical scores for EAE in Rag1<sup>-/-</sup> recipients of dLck<sup>Cre</sup> Cxcr1<sup>fl/fl</sup> (n=12) and WT (n=10) naive CD4<sup>+</sup> T cells after being immunized with MOG<sub>35–55</sub>, CFA and pertussis toxin. Data are summed from three independent experiments.

**(B)** Representative histology of the spinal cord of Rag1<sup>-/-</sup> mice after EAE induction (day 22). hematoxylin and eosin [H&E].

**(C)** On day 20 after EAE induction of Rag1<sup>-/-</sup> hosts, CD4<sup>+</sup> T cells were analyzed from the leukocytes isolated from the CNS, draining lymph nodes, and further analysed for the expression of IL-17A<sup>+</sup> and Foxp3<sup>+</sup> cells in Rag1<sup>-/-</sup> hosts. One of five experiments is shown.

**(D–G)** EAE model in dLck<sup>Cre</sup> Cxcr1<sup>fl/fl</sup> (n=11) or WT (n=9) mice. Mean clinical scores **(D)**, frequency of IL-17A<sup>+</sup> and IFNγ<sup>+</sup> T cells in leukocytes isolated from the CNS, draining lymph nodes and spleen **(E)**, frequency of Foxp3<sup>+</sup> cells from CNS-infiltrating lymphocytes **(F)**, Splenocytes were stimulated for 3 d with MOG peptide (0, 5, 25 μg/mL), and cytokine production was measured by ELISA **(G)**.

**(H–K)** EAE model in RORγt<sup>Cre</sup> Cxcr1<sup>fl/fl</sup> (n=13) or WT (n=10) mice. Mean clinical scores **(H)**, frequency of IL-17A<sup>+</sup> and IFNγ<sup>+</sup> T cells in leukocytes isolated from the CNS, draining lymph nodes and spleen **(I)**, frequency of Foxp3<sup>+</sup> cells from CNS-infiltrating lymphocytes **(J)**, Splenocytes were stimulated for 3 d with MOG peptide (0, 5, 25 μg/mL), and cytokine production was measured by ELISA **(K)**.

The statistical significance was calculated by Student's *t*-test. \*, *P* ≤ 0.05; \*\*, *P* ≤ 0.01; \*\*\*, *P* ≤ 0.001. Error bars show the mean ± SD.

Figure S5

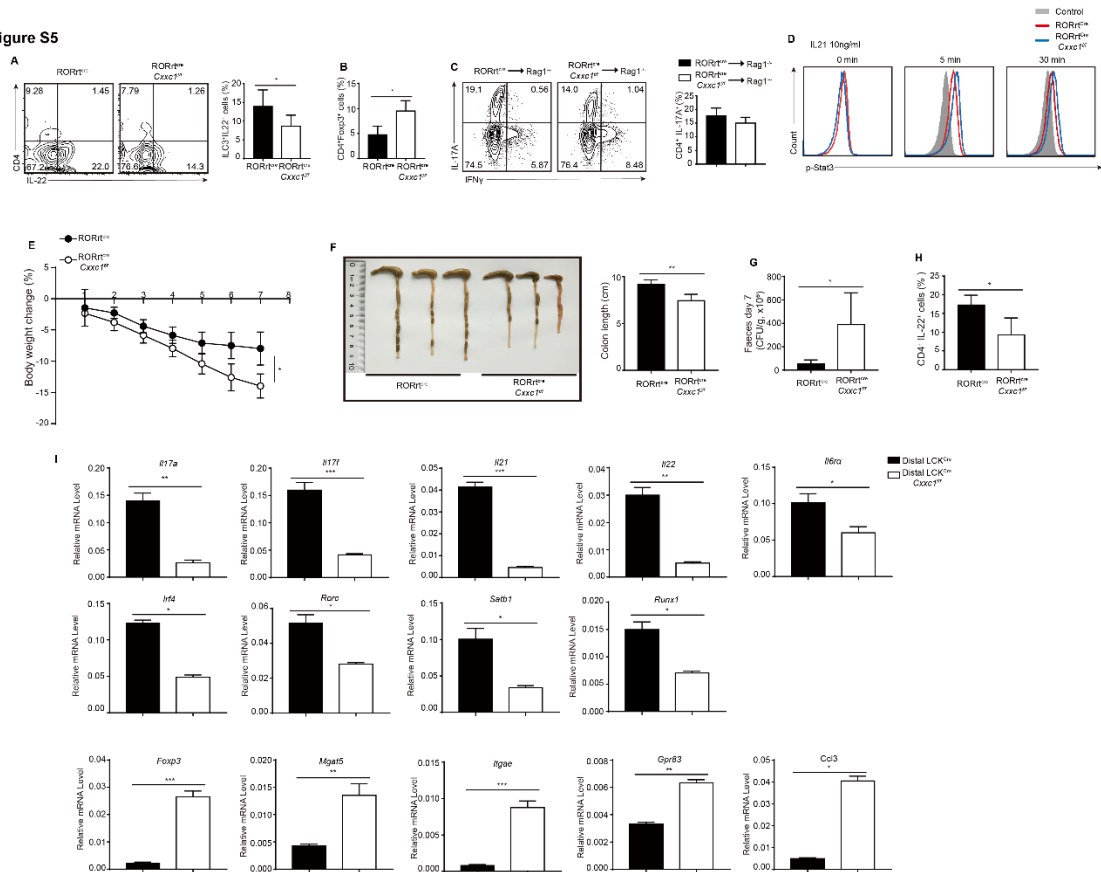

**Fig. S5. Cxcr1 deficiency increased sensitivity to *C. rodentium* infection.**

(A) FACS analysis of IL-22 expression by ILC3 (Lin<sup>-</sup>RORγt<sup>+</sup>) from isolated LPLs in Rag1<sup>-/-</sup> recipients of naive CD4<sup>+</sup> T cells from RORγt<sup>cre</sup>Cxcr1<sup>fl/fl</sup> (n=12) or WT (n=11) mice after oral inoculation with *C. rodentium* at day 7. One of four experiments is shown.

(B, C) FACS analysis of Foxp3 and IL-17A expression from isolated LPLs in Rag1<sup>-/-</sup> recipients after oral inoculation with *C. rodentium* at day 7. One of four experiments is shown.

(D) The level of STAT3 phosphorylation by IL-21 stimulation of RORγt<sup>cre</sup>Cxcr1<sup>fl/fl</sup> or WT cells. One of four experiments is shown.

(E-H) *C. rodentium* infection in dLck<sup>cre</sup>Cxcr1<sup>fl/fl</sup> (n=9) or WT (n=8) mice. Body weight changes of mice after oral inoculation with *C. rodentium* at the indicated time points (E), Colon length at day 7 (F), *C. rodentium* CFUs in the colon 7 d after inoculation (G), FACS analysis of IL-22 expression at day 7 after inoculation. One of five experiments is shown.

(I) Naive CD4<sup>+</sup> T cells (CD4<sup>+</sup>CD25<sup>-</sup>CD62L<sup>hi</sup>CD44<sup>lo</sup>) from WT and dLck<sup>cre</sup>Cxcr1<sup>fl/fl</sup> mice were differentiated in the presence of TGF-β1 and IL-6 (Th17) for 72 hr, and the expression of the selected transcripts was quantified by quantitative real-time PCR. One of five experiments is shown.

Error bars show the mean ± SD. \*, P ≤ 0.05; \*\*, P ≤ 0.01; \*\*\*, P ≤ 0.001 in a Student's *t*-test. (Photo Credit: Feng Lin, Institute of Immunology, Zhejiang University School of Medicine).



**Figure S6**

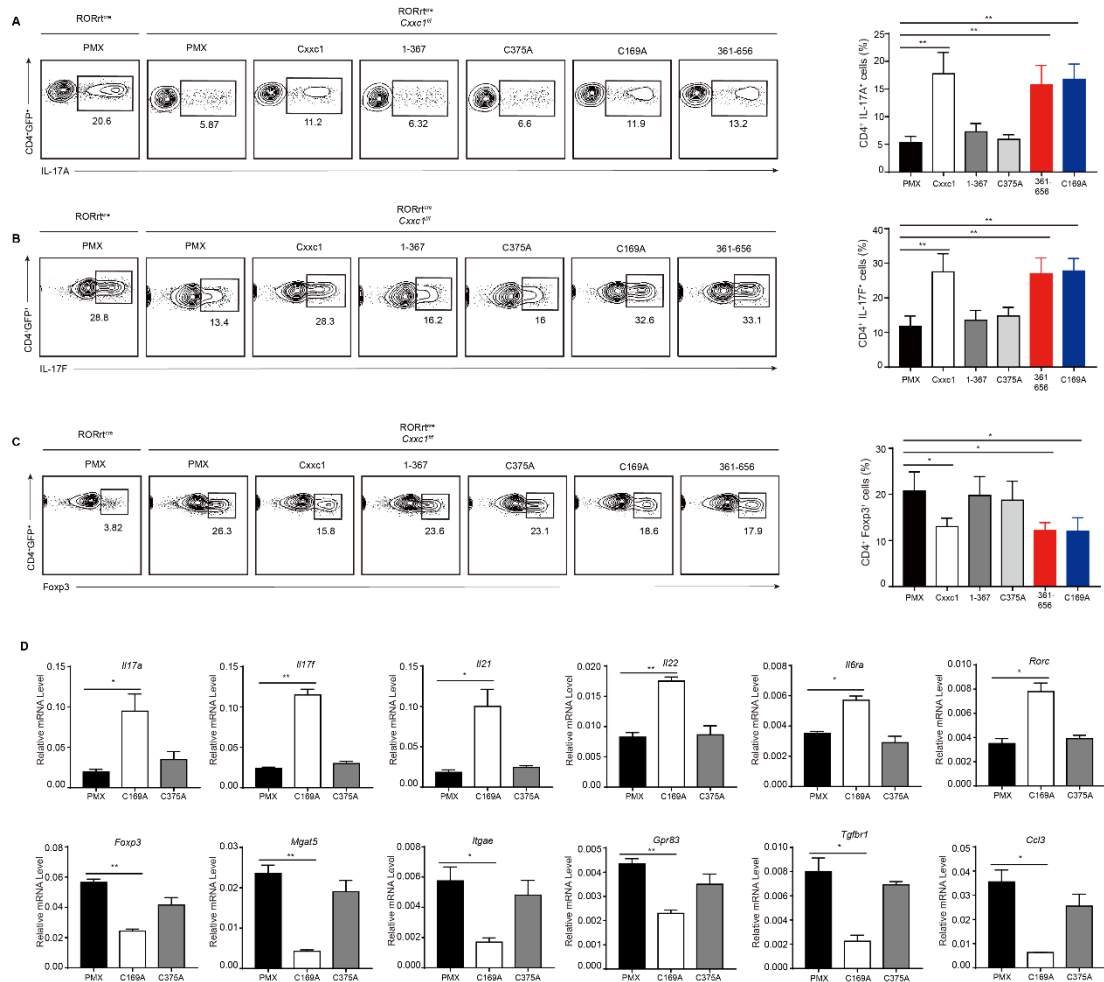

**Fig. S6. Cxyc1 regulates TH17 differentiation with its H3K4me3 function.**

(A-C) Sorted naive CD4<sup>+</sup> T cells were differentiated into Th17 cells in the presence of TGF- $\beta$ 1 and IL-6, 20-24 hr later the cells were transfected with indicated retrovirus, then IL-17A (A) and IL-17F (B), foxp3 (C) were measured by gated CD4<sup>+</sup>GFP<sup>+</sup> cells after infected retrovirus for 72 hr. One of five experiments is shown.

(D) CKO Th17 cells were transfected with indicated retrovirus for 72 hr, then gene expression changes were measured by real-time PCR. One of four experiments is shown.

The statistical significance was calculated by Student's *t*-test. \*,  $P \leq 0.05$ ; \*\*,  $P \leq 0.01$ . Error bars show the mean  $\pm$  SD.

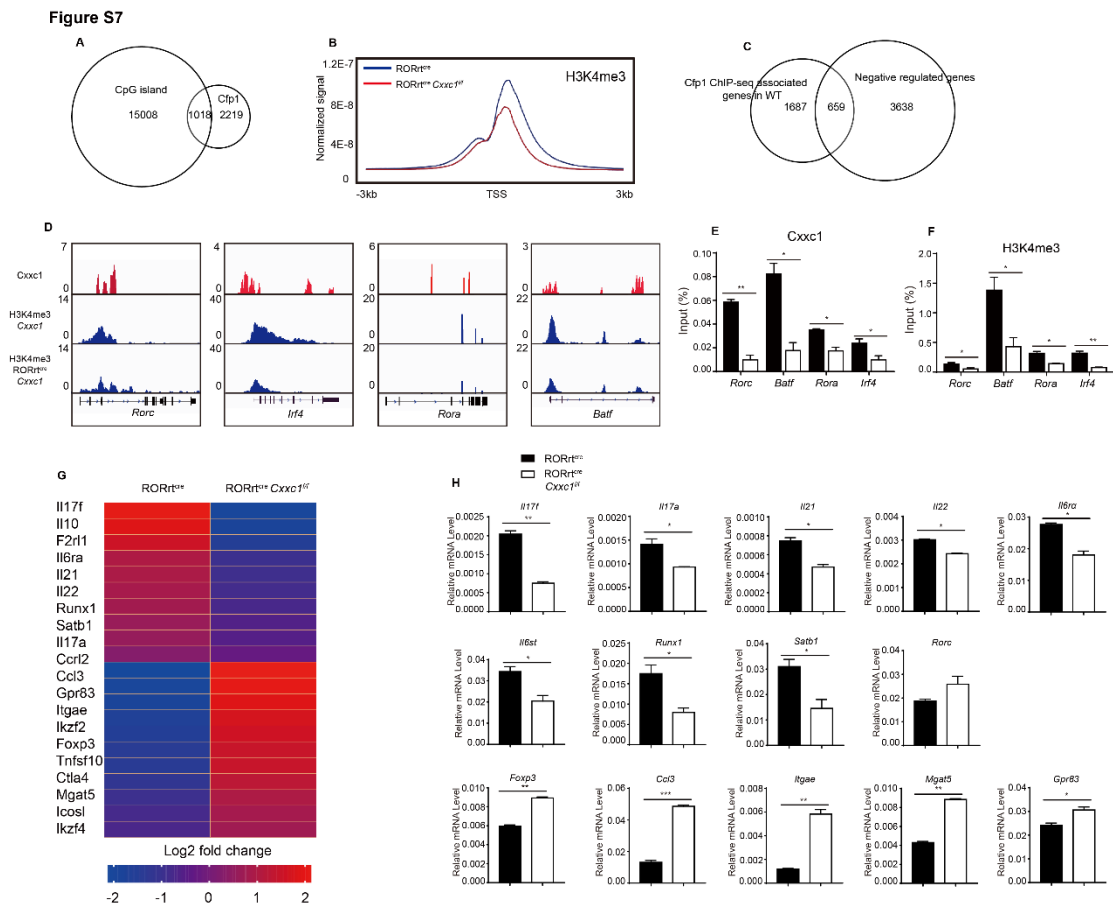

**Fig. S7. Genome-wide maps of Cxxc1 binding and H3K4me3 modifications in TH17 cells differentiated from naive CD4<sup>+</sup> T cells with TGF-β1 and IL-6 for 24 hours.**

(A) The number of genomic regions at which CGIs and Cxxc1-binding sites were colocalized.

(B) Distribution of H3K4me3 modifications around 3 kb regions flanking the TSS of all RefSeq (mm10) genes in WT and Cxxc1-deficient Th17 cells.

(C) Overlapped regions between Cxxc1-binding sites, and RNA-seq up regulated genes in WT and Cxxc1-deficient Th17 cells.

(D) IGV browser view of Cxxc1-binding peaks (red) in WT Th17 cells and H3K4me3 markers (blue) in WT and Cxxc1-deficient Th17 cells.

(E, F) Naive WT CD4<sup>+</sup> T cells were sorted and cultured under Th17 differentiation conditions (TGF-β plus IL-6) for 24 hr, and ChIP-qPCR analysis of Cxxc1 binding or H3K4me3 modifications at the indicated gene loci were performed.

(G) Naive CD4<sup>+</sup> T cells (CD4<sup>+</sup>CD25<sup>-</sup>CD62L<sup>hi</sup>CD44<sup>lo</sup>) from WT and RORγt<sup>cre</sup> Cxxc1<sup>fl/fl</sup> mice were differentiated in the presence of TGF-β1 and IL-6 (Th17) for 24 hr. Total RNA from the cells was analyzed by RNA-seq (STAR method). Heatmap of fold change (log2) for differentially expressed genes (FDR < 0.05 in Th17 is shown).

(H) The expression of the selected transcripts was quantified in Th17 cell samples differentiated from naive CD4<sup>+</sup> T cells with TGF-β1 and IL-6 for 24 hr by quantitative

real-time PCR.

Error bars show the mean  $\pm$  SD. \*,  $P \leq 0.05$ ; \*\*,  $P \leq 0.01$ ; \*\*\*,  $P \leq 0.001$  in a Student's  $t$ -test.

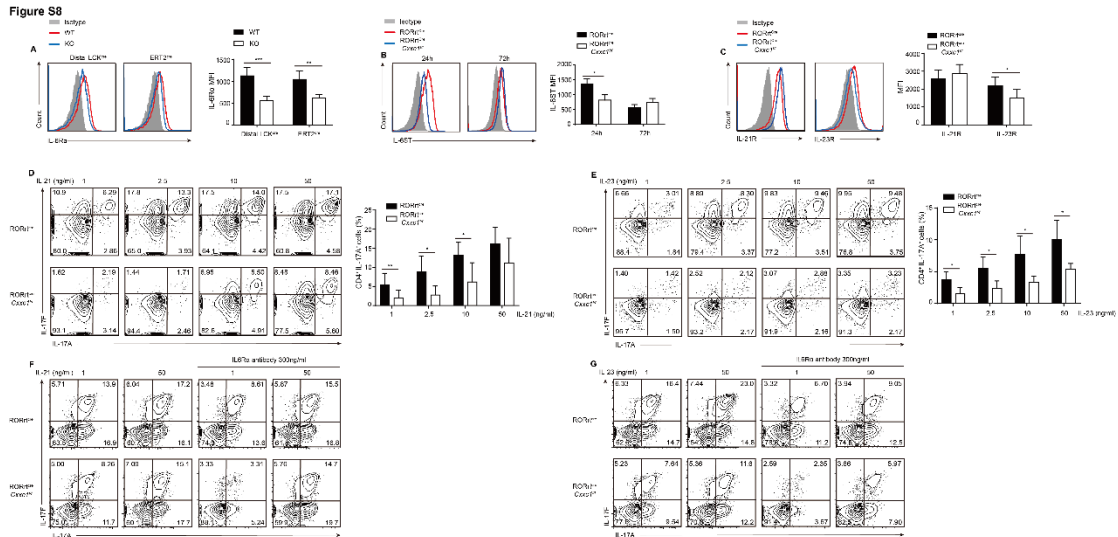

**Fig. S8. (related to Fig. 5). The IL-6–Stat3 signaling pathway was defective after *Cxhc1* deletion.**

(A) Naive CD4<sup>+</sup> T cells (CD4<sup>+</sup>CD25<sup>-</sup>CD62L<sup>hi</sup>CD44<sup>lo</sup>) from *dLck<sup>cre</sup>Cxhc1<sup>fl/fl</sup>* and WT mice or *ERT2<sup>cre</sup>Cxhc1<sup>fl/fl</sup>* mice were differentiated into Th17 cells with IL-6 and TGF-β1, then the expression of IL-6Rα was measured by flow cytometry (left), and mean fluorescence intensity (MFI) of IL-6Rα was measured (right). 4-OHT were added to delete *Cxhc1* in *ERT2<sup>cre</sup>Cxhc1<sup>fl/fl</sup>* cells. One of four experiments is shown.

(B) Naive CD4<sup>+</sup> T cells from *RORγt<sup>cre</sup>Cxhc1<sup>fl/fl</sup>* and WT mice were differentiated into Th17 cells with IL-6 and TGF-β1, then the expression of IL-6ST was measured by flow cytometry (left), and mean fluorescence intensity (MFI) of IL-6ST at different time points was measured (right). One of four experiments is shown.

(C) Naive CD4<sup>+</sup> T cells from *RORγt<sup>cre</sup>Cxhc1<sup>fl/fl</sup>* and WT mice were differentiated into Th17 cells with IL-6 and TGF-β1, then the expression levels of IL-21R and IL-23R were measured by flow cytometry (left), and mean fluorescence intensity (MFI) of IL-21R and IL-23R was measured (right). One of four experiments is shown.

(D, E) WT and *RORγt<sup>cre</sup>Cxhc1<sup>fl/fl</sup>* naive CD4<sup>+</sup> T cells were cultured in the presence of TGF-β1 and varying concentrations of IL-21 (D) or IL-23 (E) for 72 hours, and then the expression levels of IL-17A and IL-17F were analyzed. One of five experiments is shown.

(F, G) WT and *RORγt<sup>cre</sup>Cxhc1<sup>fl/fl</sup>* naive CD4<sup>+</sup> T cells were cultured in the presence of TGF-β1 and indicated concentrations of IL-21 (F) or IL-23 (G) without or with 300 ng/ml of IL-6Rα antibody for 72 hours, and then the expression levels of IL-17A and IL-17F were analyzed. One of four experiments is shown.

The statistical significance was calculated by Student's *t*-test. \*, *P* ≤ 0.05; \*\*, *P* ≤ 0.01; \*\*\*, *P* ≤ 0.001. Error bars show the mean ± SD.

**Figure S9**

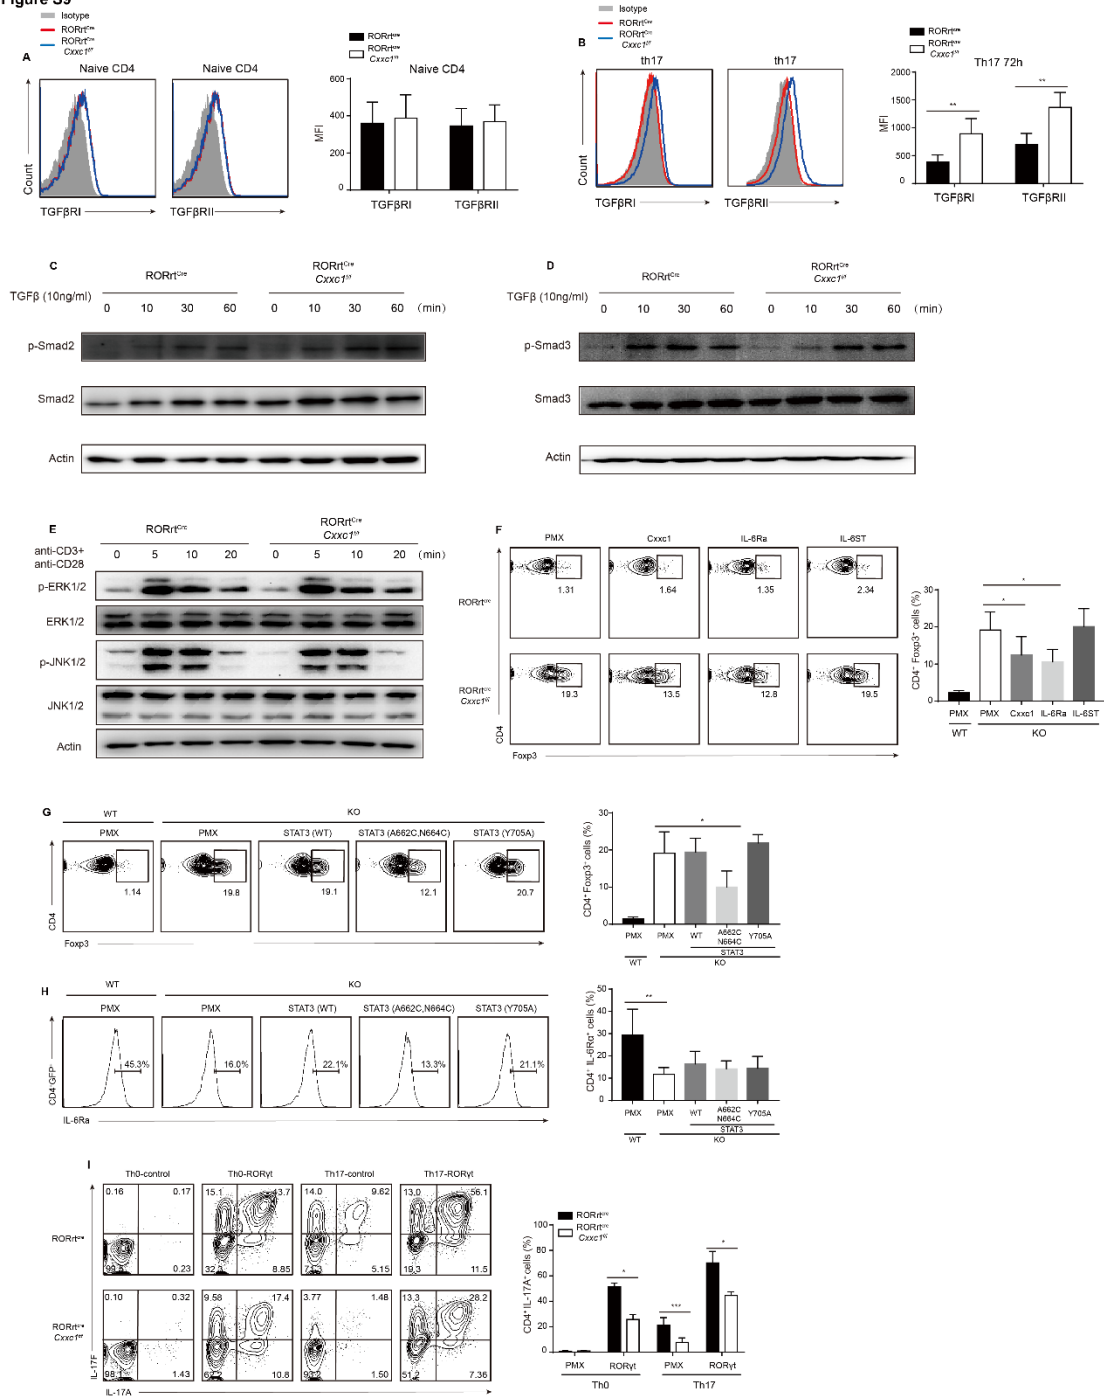

**Fig. S9. (related to Fig. 6). Cxcr1 mediates T<sub>H</sub>17 cell differentiation by mediating IL-6Rα expression. (A)** Naive CD4<sup>+</sup>T cells from RORγt<sup>cre</sup>Cxcr1<sup>fl/fl</sup> and WT mice were sorted, then the expression levels of TGFβ receptor I and II were measured by flow cytometry(left), and mean fluorescence intensity (MFI) of TGFβ receptor I and II were measured (right). One of four experiments is shown.

**(B)** Naive CD4<sup>+</sup>T cells from RORγt<sup>cre</sup>Cxcr1<sup>fl/fl</sup> and WT mice were differentiated into Th17 cells with IL-6 and TGF-β1 for 72 hours, then the expression levels of TGFβ

receptor I and II were determined by flow cytometry, and the mean fluorescence intensity (MFI) of TGF $\beta$  receptor I and II were measured (right). One of five experiments is shown.

(C, D) ROR $\gamma$ <sup>cre</sup>Cxzc1<sup>fl/fl</sup> and WT naive CD4<sup>+</sup>T cells were stimulated with 10 ng/ml TGF- $\beta$ 1 as indicated time, then phosphorylated and total smad2 and smad3 proteins were detected by western blot assays. One of four experiments is shown.

(E) Naive CD4<sup>+</sup> T cells sorted from wild-type or ROR $\gamma$ <sup>cre</sup>Cxzc1<sup>fl/fl</sup> mice were stimulated with anti-CD3 (3 $\mu$ g/ml) plus anti-CD28 (3 $\mu$ g/ml) antibodies for indicated time. The cell lysates were subjected to Western Blot using indicated antibodies. One of four experiments is shown.

(F) Naive CD4<sup>+</sup> T cells from WT and ROR $\gamma$ <sup>cre</sup>Cxzc1<sup>fl/fl</sup> mice were differentiated into Th17 cells in the presence of TGF- $\beta$ 1 and IL-6, 20-24 hr later the cells were transfected with indicated retrovirus (Mock, Cxzc1, IL6Ra and IL-6ST), then Foxp3 were measured by gated CD4<sup>+</sup> GFP<sup>+</sup> cells after infected retrovirus for 72 hr. One of five experiments is shown.

(G, H) Sorted naive CD4<sup>+</sup> T cells from WT and ROR $\gamma$ <sup>cre</sup>Cxzc1<sup>fl/fl</sup> mice were differentiated into Th17 cells in the presence of TGF- $\beta$ 1 and IL-6, 20-24 hr later the cells were transfected with indicated retrovirus (Mock, STAT3 (WT), STAT3 (A662C, N664C) and STAT3 (Y705A)), then Foxp3 (G) and IL-6R $\alpha$  (H) were measured by gated CD4<sup>+</sup> GFP<sup>+</sup> cells after infected retrovirus for 72 hr. One of four experiments is shown.

(I) Sorted naive CD4<sup>+</sup> T cells from WT and ROR $\gamma$ <sup>cre</sup>Cxzc1<sup>fl/fl</sup> mice were polarized into Th17 cells in the presence of TGF- $\beta$ 1 and IL-6, 20-24 hr later the cells were transfected with indicated retrovirus (Mock, ROR $\gamma$ ). IL-17A and IL-17F levels were then measured by gated CD4<sup>+</sup>GFP<sup>+</sup> cells after retrovirus infection for 72 hr. One of five experiments is shown.

The statistical significance was calculated by Student's *t*-test. \*,  $P \leq 0.05$ ; \*\*,  $P \leq 0.01$ ; \*\*\*,  $P \leq 0.001$ . Error bars show the mean  $\pm$  SD.

**Table S1**

Down regulated genes in Cfp1 deficient Th17 cells

|               |               |               |         |
|---------------|---------------|---------------|---------|
| Ccna2         | Hmgb2         | 1700016K19Rik | Ly6e    |
| Gm572         | Ms4a6b        | Gimap4        | Arl4c   |
| Clsn          | H2-T3         | Mcf2l         | Rdx     |
| Il2           | Emp1          | Tymp          | Tmem30b |
| Grk4          | Cxxc1         | Rcc1          | Acsf3   |
| Dapl1         | Rapgef4       | Pfdn5         | Cenpu   |
| 4930512M02Rik | Shox2         | Eya2          | Klhdc1  |
| Lrr1          | Prdm8         | Tshz1         | Cdh15   |
| Inhba         | Fbxo5         | Pced1b        | Cd28    |
| Kif11         | Olfrl423      | Maml3         | Acox1   |
| Fasl          | Rmi2          | Tdrp          | Kdsr    |
| Ncs1          | Trdmt1        | Lrrc32        | Prmt6   |
| Meis1         | Wee1          | Ust           | Scrib   |
| Fcgr1         | Mdp1          | Timm22        | Hmgb1   |
| Dtl           | Parp16        | Hs2st1        | Map4k5  |
| Bub1          | Bard1         | Slc16a10      | Scit1   |
| Il7r          | Kif2c         | Klf2          | Dennd2d |
| Esco2         | Tsen2         | Srm           | Stk38   |
| Nrep          | Klf4          | Dgka          | Ccsap   |
| Il10          | Adap1         | Helq          | Kbtbd11 |
| Il21          | Eif2b3        | Rtkn2         | Tle3    |
| Emilin1       | Mfsd2a        | Clpb          | Dbp     |
| Zfp13         | Hist1h4a      | Cep152        | Gimap8  |
| Mxra7         | Mtss1         | Satb1         | Ier2    |
| Kif15         | 1700001O22Rik | Eef2kmt       | Gclm    |
| Ccdc80        | Trappc9       | Rac2          | Ttc7b   |
| Cenpf         | Grk6          | Fam105a       | Fos     |
| Fam161a       | Wnt5b         | Me2           | Slc20a1 |
| Fndc1         | Gpr183        | Snapin        | Ezh2    |
| Zfp521        | Ubash3a       | Skap1         | Rpap3   |
| Dmrt1         | Rundc3b       | Stx18         | Hnrnpdl |
| Thy1          | Lmna          | Scml4         | Runx1   |
| Fosb          | Pik3ip1       | Zmynd19       | Dnajc6  |
| Top2a         | Lhx9          | Cdk8          | Dgkz    |
| Dut           | Sox6          | Cd44          | Tasp1   |
| Pcx           | Sfxn1         | Crebl2        | Nup210  |
| Ybey          | Ncln          | Tmem242       | Ceacam2 |
| Dnmt3b        | Il6ra         | Limd2         | Sh2d3c  |
| Sell          | Noct          | Habp4         | Bend4   |
| Spry1         | Hist1h2br     | Sgk3          |         |
| S1pr1         | St8sia6       | Gm5458        |         |
| Zdhhc14       | Cmah          | Timm13        |         |
